# Supplementary material
Source: publisher figshare collection journal article supplement (https://gsajournals.figshare.com/ndownloader/files/26444858)
Supplement: Supplementary file 1 [file 26444858]

## Sheet: Sheet1
# See ftp://ftp.ncbi.nlm.nih.gov/genomes/README_assembly_summary.txt for a description of the columns in this file.
# assembly_accession	bioproject	biosample	wgs_master	refseq_category	taxid	species_taxid	organism_name	infraspecific_name	isolate	version_status	assembly_level	release_type	genome_rep	seq_rel_date	asm_name	submitter	gbrs_paired_asm	paired_asm_comp	ftp_path	excluded_from_refseq	relation_to_type_material
GCF_000008525.1	PRJNA57787	SAMN02603995		reference genome	85962	210	Helicobacter pylori 26695	strain=26695		latest	Complete Genome	Major	Full	1999/12/22	ASM852v1	TIGR	GCA_000008525.1	identical	ftp://ftp.ncbi.nlm.nih.gov/genomes/all/GCF/000/008/525/GCF_000008525.1_ASM852v1
GCF_000027305.1	PRJNA57771	SAMN02603991		reference genome	71421	727	Haemophilus influenzae Rd KW20			latest	Complete Genome	Major	Full	1999/12/22	ASM2730v1	TIGR	GCA_000027305.1	identical	ftp://ftp.ncbi.nlm.nih.gov/genomes/all/GCF/000/027/305/GCF_000027305.1_ASM2730v1
GCF_000008625.1	PRJNA57765	SAMN02603207		reference genome	224324	63363	Aquifex aeolicus VF5	strain=VF5		latest	Complete Genome	Major	Full	1999/12/22	ASM862v1	DIVERSA	GCA_000008625.1	identical	ftp://ftp.ncbi.nlm.nih.gov/genomes/all/GCF/000/008/625/GCF_000008625.1_ASM862v1		assembly from type material
GCF_000008745.1	PRJNA57811	SAMN02603115		reference genome	115713	83558	Chlamydia pneumoniae CWL029	strain=CWL029		latest	Complete Genome	Major	Full	1999/12/22	ASM874v1	ChGP	GCA_000008745.1	identical	ftp://ftp.ncbi.nlm.nih.gov/genomes/all/GCF/000/008/745/GCF_000008745.1_ASM874v1
GCF_000008565.1	PRJNA57665	SAMN02603976		reference genome	243230	1299	Deinococcus radiodurans R1	strain=R1		latest	Complete Genome	Major	Full	2000/12/11	ASM856v1	TIGR	GCA_000008565.1	identical	ftp://ftp.ncbi.nlm.nih.gov/genomes/all/GCF/000/008/565/GCF_000008565.1_ASM856v1		assembly from type material
GCF_000006745.1	PRJNA57623	SAMN02603969		reference genome	243277	666	Vibrio cholerae O1 biovar El Tor str. N16961	strain=N16961		latest	Complete Genome	Major	Full	2001/01/09	ASM674v1	TIGR	GCA_000006745.1	identical	ftp://ftp.ncbi.nlm.nih.gov/genomes/all/GCF/000/006/745/GCF_000006745.1_ASM674v1
GCF_000008725.1	PRJNA57637	SAMN02603114		reference genome	272561	813	Chlamydia trachomatis D/UW-3/CX	strain=D/UW-3/CX		latest	Complete Genome	Major	Full	2001/01/09	ASM872v1	ChGP	GCA_000008725.1	identical	ftp://ftp.ncbi.nlm.nih.gov/genomes/all/GCF/000/008/725/GCF_000008725.1_ASM872v1
GCF_000008545.1	PRJNA57723	SAMN02603986		reference genome	243274	2336	Thermotoga maritima MSB8	strain=MSB8		latest	Complete Genome	Major	Full	2001/01/09	ASM854v1	TIGR	GCA_000008545.1	identical	ftp://ftp.ncbi.nlm.nih.gov/genomes/all/GCF/000/008/545/GCF_000008545.1_ASM854v1		assembly from type material
GCF_000006865.1	PRJNA57671	SAMN02603339		reference genome	272623	1358	Lactococcus lactis subsp. lactis Il1403	strain=IL1403		latest	Complete Genome	Major	Full	2001/03/21	ASM686v1	INRA	GCA_000006865.1	identical	ftp://ftp.ncbi.nlm.nih.gov/genomes/all/GCF/000/006/865/GCF_000006865.1_ASM686v1
GCF_000006905.1	PRJNA57891	SAMN02604005		reference genome	190650	155892	Caulobacter vibrioides CB15	strain=CB15		latest	Complete Genome	Major	Full	2002/03/06	ASM690v1	TIGR	GCA_000006905.1	identical	ftp://ftp.ncbi.nlm.nih.gov/genomes/all/GCF/000/006/905/GCF_000006905.1_ASM690v1
GCF_000007325.1	PRJNA57885	SAMN02603417		reference genome	190304	851	Fusobacterium nucleatum subsp. nucleatum ATCC 25586	strain=ATCC 25586		latest	Complete Genome	Major	Full	2002/04/09	ASM732v1	Integrated Genomics	GCA_000007325.1	identical	ftp://ftp.ncbi.nlm.nih.gov/genomes/all/GCF/000/007/325/GCF_000007325.1_ASM732v1	untrustworthy as type	assembly from type material
GCF_000007145.1	PRJNA57887	SAMN02603845		reference genome	190485	339	Xanthomonas campestris pv. campestris str. ATCC 33913	strain=ATCC 33913		latest	Complete Genome	Major	Full	2002/05/24	ASM714v1	Sao Paulo state (Brazil) Consortium	GCA_000007145.1	identical	ftp://ftp.ncbi.nlm.nih.gov/genomes/all/GCF/000/007/145/GCF_000007145.1_ASM714v1		assembly from type material
GCF_000006985.1	PRJNA57897	SAMN02604006		reference genome	194439	1097	Chlorobaculum tepidum TLS	strain=TLS		latest	Complete Genome	Major	Full	2002/07/02	ASM698v1	TIGR	GCA_000006985.1	identical	ftp://ftp.ncbi.nlm.nih.gov/genomes/all/GCF/000/006/985/GCF_000006985.1_ASM698v1		assembly from type material
GCF_000007265.1	PRJNA57943	SAMN02604013		reference genome	208435	1311	Streptococcus agalactiae 2603V/R	strain=2603V/R		latest	Complete Genome	Major	Full	2002/08/28	ASM726v1	TIGR	GCA_000007265.1	identical	ftp://ftp.ncbi.nlm.nih.gov/genomes/all/GCF/000/007/265/GCF_000007265.1_ASM726v1
GCF_000008765.1	PRJNA57677	SAMN02603243		reference genome	272562	1488	Clostridium acetobutylicum ATCC 824	strain=ATCC 824		latest	Complete Genome	Major	Full	2002/11/22	ASM876v1	Genome Therapeutics	GCA_000008765.1	identical	ftp://ftp.ncbi.nlm.nih.gov/genomes/all/GCF/000/008/765/GCF_000008765.1_ASM876v1		assembly from type material
GCF_000007045.1	PRJNA57859	SAMN02603218		reference genome	171101	1313	Streptococcus pneumoniae R6	strain=R6		latest	Complete Genome	Major	Full	2002/11/25	ASM704v1	Eli Lilly and Company	GCA_000007045.1	identical	ftp://ftp.ncbi.nlm.nih.gov/genomes/all/GCF/000/007/045/GCF_000007045.1_ASM704v1
GCF_000027345.1	PRJNA57709	SAMN02603304		reference genome	272634	2104	Mycoplasma pneumoniae M129	strain=M129		latest	Complete Genome	Major	Full	2002/12/06	ASM2734v1	Heidelberg Univ.	GCA_000027345.1	identical	ftp://ftp.ncbi.nlm.nih.gov/genomes/all/GCF/000/027/345/GCF_000027345.1_ASM2734v1
GCF_000007645.1	PRJNA57861	SAMN02603126		reference genome	176280	1282	Staphylococcus epidermidis ATCC 12228	strain=ATCC 12228		latest	Complete Genome	Major	Full	2002/12/20	ASM764v1	Chinese National HGC, Shanghai	GCA_000007645.1	identical	ftp://ftp.ncbi.nlm.nih.gov/genomes/all/GCF/000/007/645/GCF_000007645.1_ASM764v1
GCF_000007805.1	PRJNA57967	SAMN02604017		reference genome	223283	251701	Pseudomonas syringae pv. tomato str. DC3000	strain=DC3000		latest	Complete Genome	Major	Full	2003/03/05	ASM780v1	TIGR	GCA_000007805.1	identical	ftp://ftp.ncbi.nlm.nih.gov/genomes/all/GCF/000/007/805/GCF_000007805.1_ASM780v1		assembly from type material
GCF_000011065.1	PRJNA62913	SAMN02604314		reference genome	226186	818	Bacteroides thetaiotaomicron VPI-5482	strain=VPI-5482		latest	Complete Genome	Major	Full	2003/03/28	ASM1106v1	Washington University Department of Molecular Biology and Pharmacology	GCA_000011065.1	identical	ftp://ftp.ncbi.nlm.nih.gov/genomes/all/GCF/000/011/065/GCF_000011065.1_ASM1106v1		assembly from type material
GCF_000007785.1	PRJNA57669	SAMN02603978		reference genome	226185	1351	Enterococcus faecalis V583	strain=V583		latest	Complete Genome	Major	Full	2003/03/28	ASM778v1	TIGR	GCA_000007785.1	identical	ftp://ftp.ncbi.nlm.nih.gov/genomes/all/GCF/000/007/785/GCF_000007785.1_ASM778v1
GCF_000007845.1	PRJNA57909	SAMN02603432		reference genome	198094	1392	Bacillus anthracis str. Ames	strain=Ames		latest	Complete Genome	Major	Full	2003/04/30	ASM784v1	J. Craig Venter Institute	GCA_000007845.1	identical	ftp://ftp.ncbi.nlm.nih.gov/genomes/all/GCF/000/007/845/GCF_000007845.1_ASM784v1
GCF_000009085.1	PRJNA57587	SAMEA1705929		reference genome	192222	197	Campylobacter jejuni subsp. jejuni NCTC 11168 = ATCC 700819	strain=NCTC 11168		latest	Complete Genome	Major	Full	2003/05/06	ASM908v1	Sanger Institute	GCA_000009085.1	identical	ftp://ftp.ncbi.nlm.nih.gov/genomes/all/GCF/000/009/085/GCF_000009085.1_ASM908v1
GCF_000006965.1	PRJNA57603	SAMEA3283068		reference genome	266834	382	Sinorhizobium meliloti 1021	strain=1021		latest	Complete Genome	Major	Full	2003/05/06	ASM696v1	MELILO	GCA_000006965.1	identical	ftp://ftp.ncbi.nlm.nih.gov/genomes/all/GCF/000/006/965/GCF_000006965.1_ASM696v1
GCF_000009065.1	PRJNA57621	SAMEA1705942		reference genome	214092	632	Yersinia pestis CO92	strain=CO92		latest	Complete Genome	Major	Full	2003/05/06	ASM906v1	Sanger Institute	GCA_000009065.1	identical	ftp://ftp.ncbi.nlm.nih.gov/genomes/all/GCF/000/009/065/GCF_000009065.1_ASM906v1
GCF_000195735.1	PRJNA61565	SAMEA3138318		reference genome	272947	782	Rickettsia prowazekii str. Madrid E	strain=Madrid E		latest	Complete Genome	Major	Full	2003/05/06	ASM19573v1	Uppsala Univ.	GCA_000195735.1	identical	ftp://ftp.ncbi.nlm.nih.gov/genomes/all/GCF/000/195/735/GCF_000195735.1_ASM19573v1
GCF_000196035.1	PRJNA61583	SAMEA3138329		reference genome	169963	1639	Listeria monocytogenes EGD-e	strain=EGD-e		latest	Complete Genome	Major	Full	2003/05/06	ASM19603v1	European Consortium	GCA_000196035.1	identical	ftp://ftp.ncbi.nlm.nih.gov/genomes/all/GCF/000/196/035/GCF_000196035.1_ASM19603v1
GCF_000195855.1	PRJNA57697	SAMEA1705921		reference genome	272631	1769	Mycobacterium leprae TN	strain=TN		latest	Complete Genome	Major	Full	2003/05/06	ASM19585v1	Sanger Institute	GCA_000195855.1	identical	ftp://ftp.ncbi.nlm.nih.gov/genomes/all/GCF/000/195/855/GCF_000195855.1_ASM19585v1
GCF_000203835.1	PRJNA57801	SAMEA1705940		reference genome	100226	1902	Streptomyces coelicolor A3(2)			latest	Complete Genome	Major	Full	2003/05/06	ASM20383v1	Sanger Institute	GCA_000203835.1	identical	ftp://ftp.ncbi.nlm.nih.gov/genomes/all/GCF/000/203/835/GCF_000203835.1_ASM20383v1
GCF_000195995.1	PRJNA57793	SAMEA1705914		reference genome	220341	28901	Salmonella enterica subsp. enterica serovar Typhi str. CT18	strain=CT18		latest	Complete Genome	Major	Full	2003/05/06	ASM19599v1	Sanger Institute	GCA_000195995.1	identical	ftp://ftp.ncbi.nlm.nih.gov/genomes/all/GCF/000/195/995/GCF_000195995.1_ASM19599v1
GCF_000196115.1	PRJNA61589	SAMEA3138332		reference genome	243090	265606	Rhodopirellula baltica SH 1	strain=1		latest	Complete Genome	Major	Full	2003/07/07	ASM19611v1	Max-Plank-Institute	GCA_000196115.1	identical	ftp://ftp.ncbi.nlm.nih.gov/genomes/all/GCF/000/196/115/GCF_000196115.1_ASM19611v1		assembly from type material
GCF_000007925.1	PRJNA57995	SAMN02603142		reference genome	167539	1219	Prochlorococcus marinus subsp. marinus str. CCMP1375	strain=CCMP1375; SS120		latest	Complete Genome	Major	Full	2003/07/25	ASM792v1	CNRS	GCA_000007925.1	identical	ftp://ftp.ncbi.nlm.nih.gov/genomes/all/GCF/000/007/925/GCF_000007925.1_ASM792v1		assembly from type material
GCF_000195715.1	PRJNA57617	SAMEA1705933		reference genome	257313	520	Bordetella pertussis Tohama I	strain=Tohama I		latest	Complete Genome	Major	Full	2003/08/12	ASM19571v1	Sanger Institute	GCA_000195715.1	identical	ftp://ftp.ncbi.nlm.nih.gov/genomes/all/GCF/000/195/715/GCF_000195715.1_ASM19571v1
GCF_000011385.1	PRJNA58011	SAMD00061120		reference genome	251221	33072	Gloeobacter violaceus PCC 7421	strain=PCC 7421		latest	Complete Genome	Major	Full	2003/10/03	ASM1138v1	Kazusa	GCA_000011385.1	identical	ftp://ftp.ncbi.nlm.nih.gov/genomes/all/GCF/000/011/385/GCF_000011385.1_ASM1138v1		assembly from type material
GCF_000008185.1	PRJNA57583	SAMN02603967		reference genome	243275	158	Treponema denticola ATCC 35405	strain=ATCC 35405		latest	Complete Genome	Major	Full	2004/02/03	ASM818v1	TIGR	GCA_000008185.1	identical	ftp://ftp.ncbi.nlm.nih.gov/genomes/all/GCF/000/008/185/GCF_000008185.1_ASM818v1		assembly from type material
GCF_000011325.1	PRJNA57905	SAMD00061105		reference genome	196627	1718	Corynebacterium glutamicum ATCC 13032	strain=ATCC 13032		latest	Complete Genome	Major	Full	2004/02/18	ASM1132v1	Kitasato Univ.	GCA_000011325.1	identical	ftp://ftp.ncbi.nlm.nih.gov/genomes/all/GCF/000/011/325/GCF_000011325.1_ASM1132v1		assembly from type material
GCF_000195755.1	PRJNA57645	SAMN02603973		reference genome	882	881	Desulfovibrio vulgaris str. Hildenborough	strain=Hildenborough		latest	Complete Genome	Major	Full	2004/04/21	ASM19575v1	TIGR	GCA_000195755.1	identical	ftp://ftp.ncbi.nlm.nih.gov/genomes/all/GCF/000/195/755/GCF_000195755.1_ASM19575v1		assembly from type material
GCF_000009605.1	PRJNA57805	SAMD00061095		reference genome	107806	9	Buchnera aphidicola str. APS (Acyrthosiphon pisum)	strain=APS	Tokyo1998	latest	Complete Genome	Major	Full	2004/05/11	ASM960v1	Rikken GSC	GCA_000009605.1	identical	ftp://ftp.ncbi.nlm.nih.gov/genomes/all/GCF/000/009/605/GCF_000009605.1_ASM960v1
GCF_000196095.1	PRJNA57969	SAMD00058707		reference genome	223926	670	Vibrio parahaemolyticus RIMD 2210633			latest	Complete Genome	Major	Full	2004/05/11	ASM19609v1	Osaka Univ.	GCA_000196095.1	identical	ftp://ftp.ncbi.nlm.nih.gov/genomes/all/GCF/000/196/095/GCF_000196095.1_ASM19609v1
GCF_000011345.1	PRJNA57907	SAMD00061106		reference genome	197221	146786	Thermosynechococcus elongatus BP-1			latest	Complete Genome	Major	Full	2004/05/11	ASM1134v1	Kazusa	GCA_000011345.1	identical	ftp://ftp.ncbi.nlm.nih.gov/genomes/all/GCF/000/011/345/GCF_000011345.1_ASM1134v1
GCF_000011365.1	PRJNA57599	SAMD00061083		reference genome	224911	1355477	Bradyrhizobium diazoefficiens USDA 110	strain=USDA 110		latest	Complete Genome	Major	Full	2004/05/11	ASM1136v1	Kazusa	GCA_000011365.1	identical	ftp://ftp.ncbi.nlm.nih.gov/genomes/all/GCF/000/011/365/GCF_000011365.1_ASM1136v1		assembly from type material
GCF_000008165.1	PRJNA58091	SAMN02598266		reference genome	260799	1392	Bacillus anthracis str. Sterne	strain=Sterne		latest	Complete Genome	Major	Full	2004/06/24	ASM816v1	DOE Joint Genome Institute	GCA_000008165.1	identical	ftp://ftp.ncbi.nlm.nih.gov/genomes/all/GCF/000/008/165/GCF_000008165.1_ASM816v1
GCF_000007825.1	PRJNA57975	SAMN02603340		reference genome	226900	1396	Bacillus cereus ATCC 14579	strain=ATCC 14579		latest	Complete Genome	Major	Full	2004/07/06	ASM782v1	INRA	GCA_000007825.1	identical	ftp://ftp.ncbi.nlm.nih.gov/genomes/all/GCF/000/007/825/GCF_000007825.1_ASM782v1		assembly from type material
GCF_000008305.1	PRJNA58055	SAMN03081416		reference genome	265311	2151	Mesoplasma florum L1	strain=L1; ATCC 33453		latest	Complete Genome	Major	Full	2004/07/19	ASM830v1	Broad Institute	GCA_000008305.1	identical	ftp://ftp.ncbi.nlm.nih.gov/genomes/all/GCF/000/008/305/GCF_000008305.1_ASM830v1		assembly from type material
GCF_000009925.1	PRJNA58195	SAMD00061068		reference genome	295405	817	Bacteroides fragilis YCH46	strain=YCH46		latest	Complete Genome	Major	Full	2004/09/16	ASM992v1	Kitasato Univ.	GCA_000009925.1	identical	ftp://ftp.ncbi.nlm.nih.gov/genomes/all/GCF/000/009/925/GCF_000009925.1_ASM992v1
GCF_000011545.1	PRJNA57733	SAMEA1705938		reference genome	272560	28450	Burkholderia pseudomallei K96243	strain=K96243		latest	Complete Genome	Major	Full	2004/09/16	ASM1154v1	Sanger Institute	GCA_000011545.1	identical	ftp://ftp.ncbi.nlm.nih.gov/genomes/all/GCF/000/011/545/GCF_000011545.1_ASM1154v1
GCF_000008485.1	PRJNA57609	SAMN02603156		reference genome	272624	446	Legionella pneumophila subsp. pneumophila str. Philadelphia 1	strain=Philadelphia 1		latest	Complete Genome	Major	Full	2004/09/24	ASM848v1	Columbia Genome Center	GCA_000008485.1	identical	ftp://ftp.ncbi.nlm.nih.gov/genomes/all/GCF/000/008/485/GCF_000008485.1_ASM848v1		assembly from type material
GCF_000091545.1	PRJNA58223	SAMD00061070		reference genome	300852	274	Thermus thermophilus HB8	strain=HB8		latest	Complete Genome	Major	Full	2004/11/15	ASM9154v1	National Institute of Advanced Industrial Science and Technology, Japan	GCA_000091545.1	identical	ftp://ftp.ncbi.nlm.nih.gov/genomes/all/GCF/000/091/545/GCF_000091545.1_ASM9154v1		assembly from type material
GCF_000008505.1	PRJNA58089	SAMN02598265		reference genome	281309	1428	[Bacillus thuringiensis] serovar konkukian str. 97-27	strain=97-27		latest	Complete Genome	Major	Full	2004/12/27	ASM850v1	DOE Joint Genome Institute	GCA_000008505.1	identical	ftp://ftp.ncbi.nlm.nih.gov/genomes/all/GCF/000/008/505/GCF_000008505.1_ASM850v1
GCF_000007525.1	PRJNA57939	SAMN02603675		reference genome	206672	216816	Bifidobacterium longum NCC2705	strain=NCC2705		latest	Complete Genome	Major	Full	2005/01/21	ASM752v1	Nestle Research Center, Switzerland	GCA_000007525.1	identical	ftp://ftp.ncbi.nlm.nih.gov/genomes/all/GCF/000/007/525/GCF_000007525.1_ASM752v1
GCF_000006845.1	PRJNA57611	SAMN02604088		reference genome	242231	485	Neisseria gonorrhoeae FA 1090	strain=FA 1090		latest	Complete Genome	Major	Full	2005/02/14	ASM684v1	Univ. Oklahoma	GCA_000006845.1	identical	ftp://ftp.ncbi.nlm.nih.gov/genomes/all/GCF/000/006/845/GCF_000006845.1_ASM684v1
GCF_000012245.1	PRJNA57931	SAMN02604347		reference genome	205918	317	Pseudomonas syringae pv. syringae B728a	strain=B728a		latest	Complete Genome	Major	Full	2005/05/12	ASM1224v1	DOE Joint Genome Institute	GCA_000012245.1	identical	ftp://ftp.ncbi.nlm.nih.gov/genomes/all/GCF/000/012/245/GCF_000012245.1_ASM1224v1
GCF_000008805.1	PRJNA57817	SAMN02603997		reference genome	122586	487	Neisseria meningitidis MC58	strain=MC58		latest	Complete Genome	Major	Full	2005/05/26	ASM880v1	TIGR	GCA_000008805.1	identical	ftp://ftp.ncbi.nlm.nih.gov/genomes/all/GCF/000/008/805/GCF_000008805.1_ASM880v1
GCF_000011705.1	PRJNA57725	SAMN02603987		reference genome	243160	13373	Burkholderia mallei ATCC 23344	strain=ATCC 23344		latest	Complete Genome	Major	Full	2005/06/06	ASM1170v1	TIGR	GCA_000011705.1	identical	ftp://ftp.ncbi.nlm.nih.gov/genomes/all/GCF/000/011/705/GCF_000011705.1_ASM1170v1		assembly from type material
GCF_000013085.1	PRJNA57655	SAMN02598538		reference genome	269796	1085	Rhodospirillum rubrum ATCC 11170	strain=ATCC 11170		latest	Complete Genome	Major	Full	2005/12/12	ASM1308v1	DOE Joint Genome Institute	GCA_000013085.1	identical	ftp://ftp.ncbi.nlm.nih.gov/genomes/all/GCF/000/013/085/GCF_000013085.1_ASM1308v1		assembly from type material
GCF_000013105.1	PRJNA58051	SAMN02598257		reference genome	264732	1525	Moorella thermoacetica ATCC 39073	strain=ATCC 39073		latest	Complete Genome	Major	Full	2005/12/12	ASM1310v1	DOE Joint Genome Institute	GCA_000013105.1	identical	ftp://ftp.ncbi.nlm.nih.gov/genomes/all/GCF/000/013/105/GCF_000013105.1_ASM1310v1
GCF_000013045.1	PRJNA58513	SAMN02604045		reference genome	309807	146919	Salinibacter ruber DSM 13855	strain=DSM 13855; M31		latest	Complete Genome	Major	Full	2005/12/20	ASM1304v1	TIGR	GCA_000013045.1	identical	ftp://ftp.ncbi.nlm.nih.gov/genomes/all/GCF/000/013/045/GCF_000013045.1_ASM1304v1		assembly from type material
GCF_000013425.1	PRJNA57795	SAMN02604235		reference genome	93061	1280	Staphylococcus aureus subsp. aureus NCTC 8325	strain=NCTC 8325		latest	Complete Genome	Major	Full	2006/02/13	ASM1342v1	University of Oklahoma Health Sciences Center	GCA_000013425.1	identical	ftp://ftp.ncbi.nlm.nih.gov/genomes/all/GCF/000/013/425/GCF_000013425.1_ASM1342v1
GCF_000008925.1	PRJNA58233	SAMN02604111		reference genome	362948	1624	Lactobacillus salivarius UCC118	strain=UCC118		latest	Complete Genome	Major	Full	2006/03/30	ASM892v1	University College Cork	GCA_000008925.1	identical	ftp://ftp.ncbi.nlm.nih.gov/genomes/all/GCF/000/008/925/GCF_000008925.1_ASM892v1
GCF_000006765.1	PRJNA57945	SAMN02603714		reference genome	208964	287	Pseudomonas aeruginosa PAO1	strain=PAO1		latest	Complete Genome	Major	Full	2006/07/07	ASM676v1	PathoGenesis Corporation	GCA_000006765.1	identical	ftp://ftp.ncbi.nlm.nih.gov/genomes/all/GCF/000/006/765/GCF_000006765.1_ASM676v1
GCF_000014525.1	PRJNA57985	SAMN02598528		reference genome	321967	1597	Lactobacillus paracasei ATCC 334	strain=ATCC 334		latest	Complete Genome	Major	Full	2006/10/13	ASM1452v1	US DOE Joint Genome Institute (JGI), The Lactic Acid Bacteria Genome Consortium and Fidelity Systems Inc.	GCA_000014525.1	identical	ftp://ftp.ncbi.nlm.nih.gov/genomes/all/GCF/000/014/525/GCF_000014525.1_ASM1452v1
GCF_000014805.1	PRJNA58617	SAMN02604052		reference genome	380703	644	Aeromonas hydrophila subsp. hydrophila ATCC 7966	strain=ATCC 7966		latest	Complete Genome	Major	Full	2006/11/06	ASM1480v1	TIGR	GCA_000014805.1	identical	ftp://ftp.ncbi.nlm.nih.gov/genomes/all/GCF/000/014/805/GCF_000014805.1_ASM1480v1		assembly from type material
GCF_000015005.1	PRJNA57701	SAMN02603982		reference genome	246196	1772	Mycolicibacterium smegmatis MC2 155	strain=MC2 155		latest	Complete Genome	Major	Full	2006/11/20	ASM1500v1	TIGR	GCA_000015005.1	identical	ftp://ftp.ncbi.nlm.nih.gov/genomes/all/GCF/000/015/005/GCF_000015005.1_ASM1500v1
GCF_000009345.1	PRJNA57741	SAMEA1705958		reference genome	393305	630	Yersinia enterocolitica subsp. enterocolitica 8081	strain=8081		latest	Complete Genome	Major	Full	2007/01/12	ASM934v1	Sanger Institute	GCA_000009345.1	identical	ftp://ftp.ncbi.nlm.nih.gov/genomes/all/GCF/000/009/345/GCF_000009345.1_ASM934v1
GCF_000014205.1	PRJNA224116	SAMN02604299		reference genome	388919	1305	Streptococcus sanguinis SK36	strain=SK36		latest	Complete Genome	Major	Full	2007/02/09	ASM1420v1	Virginia Commonwealth University	GCA_000014205.1	identical	ftp://ftp.ncbi.nlm.nih.gov/genomes/all/GCF/000/014/205/GCF_000014205.1_ASM1420v1
GCF_000011445.1	PRJNA58031	SAMEA3138208		reference genome	272632	2102	Mycoplasma mycoides subsp. mycoides SC str. PG1	strain=PG1		latest	Complete Genome	Major	Full	2007/02/27	ASM1144v1	Royal Institute of Technology, Stockholm, Sweden	GCA_000011445.1	identical	ftp://ftp.ncbi.nlm.nih.gov/genomes/all/GCF/000/011/445/GCF_000011445.1_ASM1144v1	untrustworthy as type	assembly from type material
GCF_000012005.1	PRJNA58213	SAMN02603600		reference genome	300267	622	Shigella dysenteriae Sd197	strain=Sd197		latest	Complete Genome	Major	Full	2007/04/05	ASM1200v1	Microbial Genome Center of ChMPH	GCA_000012005.1	identical	ftp://ftp.ncbi.nlm.nih.gov/genomes/all/GCF/000/012/005/GCF_000012005.1_ASM1200v1
GCF_000063585.1	PRJNA61579	SAMEA1705919		reference genome	413999	1491	Clostridium botulinum A str. ATCC 3502	strain=ATCC 3502		latest	Complete Genome	Major	Full	2007/05/24	ASM6358v1	Sanger Institute	GCA_000063585.1	identical	ftp://ftp.ncbi.nlm.nih.gov/genomes/all/GCF/000/063/585/GCF_000063585.1_ASM6358v1
GCF_000017145.1	PRJNA58549	SAMN02598363		reference genome	366394	110321	Sinorhizobium medicae WSM419	strain=WSM419		latest	Complete Genome	Major	Full	2007/06/29	ASM1714v1	US DOE Joint Genome Institute	GCA_000017145.1	identical	ftp://ftp.ncbi.nlm.nih.gov/genomes/all/GCF/000/017/145/GCF_000017145.1_ASM1714v1
GCF_000017045.1	PRJNA58931	SAMN02603534		reference genome	441771	1491	Clostridium botulinum A str. Hall	strain=Hall		latest	Complete Genome	Major	Full	2007/07/20	ASM1704v1	Los Alamos National Laboratory	GCA_000017045.1	identical	ftp://ftp.ncbi.nlm.nih.gov/genomes/all/GCF/000/017/045/GCF_000017045.1_ASM1704v1
GCF_000011985.1	PRJNA57685	SAMN02603047		reference genome	272621	1579	Lactobacillus acidophilus NCFM	strain=NCFM		latest	Complete Genome	Major	Full	2007/11/01	ASM1198v1	Cal Poly. San Luis Obispo	GCA_000011985.1	identical	ftp://ftp.ncbi.nlm.nih.gov/genomes/all/GCF/000/011/985/GCF_000011985.1_ASM1198v1
GCF_000092025.1	PRJNA57865	SAMN02603108		reference genome	176299	1176649	Agrobacterium fabrum str. C58	strain=C58		latest	Complete Genome	Major	Full	2007/11/05	ASM9202v1	Cereon	GCA_000092025.1	identical	ftp://ftp.ncbi.nlm.nih.gov/genomes/all/GCF/000/092/025/GCF_000092025.1_ASM9202v1		assembly from type material
GCF_000018865.1	PRJNA57657	SAMN02598539		reference genome	324602	1108	Chloroflexus aurantiacus J-10-fl	strain=J-10-fl		latest	Complete Genome	Major	Full	2007/12/20	ASM1886v1	US DOE Joint Genome Institute	GCA_000018865.1	identical	ftp://ftp.ncbi.nlm.nih.gov/genomes/all/GCF/000/018/865/GCF_000018865.1_ASM1886v1		assembly from type material
GCF_000068585.1	PRJNA61633	SAMEA1705923		reference genome	471472	813	Chlamydia trachomatis 434/Bu	strain=434/Bu		latest	Complete Genome	Major	Full	2008/01/17	ASM6858v1	Wellcome Trust Sanger Institute	GCA_000068585.1	identical	ftp://ftp.ncbi.nlm.nih.gov/genomes/all/GCF/000/068/585/GCF_000068585.1_ASM6858v1
GCF_000069185.1	PRJNA61613	SAMEA3138276		reference genome	561007	36809	Mycobacteroides abscessus ATCC 19977			latest	Complete Genome	Major	Full	2008/03/01	ASM6918v1	Genoscope	GCA_000069185.1	identical	ftp://ftp.ncbi.nlm.nih.gov/genomes/all/GCF/000/069/185/GCF_000069185.1_ASM6918v1		assembly from type material
GCF_000011805.1	PRJNA58163	SAMN02604303		reference genome	312309	668	Aliivibrio fischeri ES114	strain=ES114		latest	Complete Genome	Major	Full	2008/04/02	ASM1180v1	W.M. Keck Microbial Communities and Cell-signaling Program	GCA_000011805.1	identical	ftp://ftp.ncbi.nlm.nih.gov/genomes/all/GCF/000/011/805/GCF_000011805.1_ASM1180v1
GCF_000020985.1	PRJNA59257	SAMN02603929		reference genome	289376	28262	Thermodesulfovibrio yellowstonii DSM 11347	strain=DSM 11347		latest	Complete Genome	Major	Full	2008/09/26	ASM2098v1	The J. Craig Venter Institute	GCA_000020985.1	identical	ftp://ftp.ncbi.nlm.nih.gov/genomes/all/GCF/000/020/985/GCF_000020985.1_ASM2098v1		assembly from type material
GCF_000021645.1	PRJNA59177	SAMN00002661		reference genome	515635	513050	Dictyoglomus turgidum DSM 6724	strain=DSM 6724		latest	Complete Genome	Major	Full	2008/12/12	ASM2164v1	US DOE Joint Genome Institute (JGI-PGF)	GCA_000021645.1	identical	ftp://ftp.ncbi.nlm.nih.gov/genomes/all/GCF/000/021/645/GCF_000021645.1_ASM2164v1		assembly from type material
GCF_000026345.1	PRJNA59381	SAMEA3138234		reference genome	585057	562	Escherichia coli IAI39	strain=IAI39		latest	Complete Genome	Major	Full	2008/12/18	ASM2634v1	Genoscope	GCA_000026345.1	identical	ftp://ftp.ncbi.nlm.nih.gov/genomes/all/GCF/000/026/345/GCF_000026345.1_ASM2634v1
GCF_000022005.1	PRJNA59307	SAMN02604151		reference genome	565050	155892	Caulobacter vibrioides NA1000	strain=NA1000		latest	Complete Genome	Major	Full	2009/01/16	ASM2200v1	University of Chicago	GCA_000022005.1	identical	ftp://ftp.ncbi.nlm.nih.gov/genomes/all/GCF/000/022/005/GCF_000022005.1_ASM2200v1
GCF_000009045.1	PRJNA57675	SAMEA3138188		reference genome	224308	1423	Bacillus subtilis subsp. subtilis str. 168	strain=168		latest	Complete Genome	Major	Full	2009/03/17	ASM904v1	BSNR	GCA_000009045.1	identical	ftp://ftp.ncbi.nlm.nih.gov/genomes/all/GCF/000/009/045/GCF_000009045.1_ASM904v1		assembly from type material
GCF_000018545.1	PRJNA59081	SAMN02603283		reference genome	394	380	Sinorhizobium fredii NGR234	strain=NGR234		latest	Complete Genome	Major	Full	2009/04/22	ASM1854v1	Goettingen Genomics Laboratory	GCA_000018545.1	identical	ftp://ftp.ncbi.nlm.nih.gov/genomes/all/GCF/000/018/545/GCF_000018545.1_ASM1854v1
GCF_000008985.1	PRJNA57589	SAMEA3138185		reference genome	177416	263	Francisella tularensis subsp. tularensis SCHU S4	strain=SCHU S4		latest	Complete Genome	Major	Full	2009/06/18	ASM898v1	Swedish Defence Research Agency	GCA_000008985.1	identical	ftp://ftp.ncbi.nlm.nih.gov/genomes/all/GCF/000/008/985/GCF_000008985.1_ASM898v1
GCF_000026745.1	PRJNA59321	SAMEA2272697		reference genome	568814	1307	Streptococcus suis BM407	strain=BM407		latest	Complete Genome	Major	Full	2009/07/07	ASM2674v1	The Wellcome Trust Sanger Institute	GCA_000026745.1	identical	ftp://ftp.ncbi.nlm.nih.gov/genomes/all/GCF/000/026/745/GCF_000026745.1_ASM2674v1
GCF_000023405.1	PRJNA58649	SAMN00002685		reference genome	446465	43669	Brachybacterium faecium DSM 4810	strain=DSM 4810		latest	Complete Genome	Major	Full	2009/08/25	ASM2340v1	US DOE Joint Genome Institute (JGI-PGF)	GCA_000023405.1	identical	ftp://ftp.ncbi.nlm.nih.gov/genomes/all/GCF/000/023/405/GCF_000023405.1_ASM2340v1		assembly from type material
GCF_000024905.1	PRJNA41925	SAMN00002595		reference genome	525903	81462	Thermanaerovibrio acidaminovorans DSM 6589	strain=DSM 6589		latest	Complete Genome	Major	Full	2009/11/19	ASM2490v1	US DOE Joint Genome Institute (JGI-PGF)	GCA_000024905.1	identical	ftp://ftp.ncbi.nlm.nih.gov/genomes/all/GCF/000/024/905/GCF_000024905.1_ASM2490v1		assembly from type material
GCF_000027165.1	PRJNA46097	SAMEA3138244		reference genome	365659	28037	Streptococcus mitis B6	strain=B6		latest	Complete Genome	Major	Full	2010/02/16	ASM2716v1	Department of Microbiology, University of Kaiserslautern	GCA_000027165.1	identical	ftp://ftp.ncbi.nlm.nih.gov/genomes/all/GCF/000/027/165/GCF_000027165.1_ASM2716v1
GCF_000092565.1	PRJNA57881	SAMN02603127		reference genome	189518	173	Leptospira interrogans serovar Lai str. 56601	strain=56601		latest	Complete Genome	Major	Full	2010/04/06	ASM9256v1	Chinese National HGC, Shanghai	GCA_000092565.1	identical	ftp://ftp.ncbi.nlm.nih.gov/genomes/all/GCF/000/092/565/GCF_000092565.1_ASM9256v1
GCF_000025565.1	PRJNA48363	SAMN02603901		reference genome	716541	550	Enterobacter cloacae subsp. cloacae ATCC 13047	strain=ATCC 13047		latest	Complete Genome	Major	Full	2010/04/23	ASM2556v1	TEDA School of Biological Sciences and Biotechnology, Nankai University	GCA_000025565.1	identical	ftp://ftp.ncbi.nlm.nih.gov/genomes/all/GCF/000/025/565/GCF_000025565.1_ASM2556v1		assembly from type material
GCF_000196835.1	PRJNA50565	SAMN02603409		reference genome	749927	33910	Amycolatopsis mediterranei U32	strain=U32		latest	Complete Genome	Major	Full	2010/06/29	ASM19683v1	Institute of Plant Physiology and Ecology, Shanghai Institutes for Biological Sciences, Chinese Academy of Sciences	GCA_000196835.1	identical	ftp://ftp.ncbi.nlm.nih.gov/genomes/all/GCF/000/196/835/GCF_000196835.1_ASM19683v1
GCF_000165905.1	PRJNA59883	SAMN02603510		reference genome	702459	1681	Bifidobacterium bifidum PRL2010	strain=PRL2010		latest	Complete Genome	Major	Full	2010/11/02	ASM16590v1	Laboratory of Probiogenomics, Department of genetics, university of Parma, Italy	GCA_000165905.1	identical	ftp://ftp.ncbi.nlm.nih.gov/genomes/all/GCF/000/165/905/GCF_000165905.1_ASM16590v1
GCF_000159155.2	PRJNA55487	SAMN00001462		reference genome	525284	2702	Gardnerella vaginalis ATCC 14019	strain=ATCC 14019		latest	Complete Genome	Major	Full	2010/11/03	ASM15915v2	Baylor College of Medicine	GCA_000159155.2	identical	ftp://ftp.ncbi.nlm.nih.gov/genomes/all/GCF/000/159/155/GCF_000159155.2_ASM15915v2
GCF_000183345.1	PRJNA161987	SAMN02603727		reference genome	685038	562	Escherichia coli O83:H1 str. NRG 857C	strain=NRG 857C		latest	Complete Genome	Major	Full	2010/11/30	ASM18334v1	Public Health Agency of Canada Laboratory for Foodborne Zoonoses	GCA_000183345.1	identical	ftp://ftp.ncbi.nlm.nih.gov/genomes/all/GCF/000/183/345/GCF_000183345.1_ASM18334v1
GCF_000185905.1	PRJNA62101	SAMN00713576		reference genome	765698	39645	Mesorhizobium ciceri biovar biserrulae WSM1271	strain=WSM1271		latest	Complete Genome	Major	Full	2011/01/07	ASM18590v1	US DOE Joint Genome Institute	GCA_000185905.1	identical	ftp://ftp.ncbi.nlm.nih.gov/genomes/all/GCF/000/185/905/GCF_000185905.1_ASM18590v1
GCF_000191145.1	PRJNA83123	SAMN02603040		reference genome	871585	48296	Acinetobacter pittii PHEA-2	strain=PHEA-2		latest	Complete Genome	Major	Full	2011/03/03	ASM19114v1	Biotechnology Research Institute, Chinese Academy of Agricultural Sciences	GCA_000191145.1	identical	ftp://ftp.ncbi.nlm.nih.gov/genomes/all/GCF/000/191/145/GCF_000191145.1_ASM19114v1
GCF_000215745.1	PRJNA68103	SAMN02603581		reference genome	1028307	548	Klebsiella aerogenes KCTC 2190	strain=KCTC 2190		latest	Complete Genome	Major	Full	2011/06/03	ASM21574v1	Macrogen Inc.	GCA_000215745.1	identical	ftp://ftp.ncbi.nlm.nih.gov/genomes/all/GCF/000/215/745/GCF_000215745.1_ASM21574v1		assembly from type material
GCF_000203855.3	PRJNA62911	SAMEA3138345		reference genome	220668	1590	Lactobacillus plantarum WCFS1	strain=WCFS1	NCIMB8826	latest	Complete Genome	Major	Full	2011/08/01	ASM20385v3	Wageningen Centre for Food Sciences	GCA_000203855.3	identical	ftp://ftp.ncbi.nlm.nih.gov/genomes/all/GCF/000/203/855/GCF_000203855.3_ASM20385v3
GCF_000006925.2	PRJNA62907	SAMN02603599		reference genome	198214	623	Shigella flexneri 2a str. 301	strain=301		latest	Complete Genome	Major	Full	2011/08/03	ASM692v2	Microbial Genome Center of ChMPH	GCA_000006925.2	identical	ftp://ftp.ncbi.nlm.nih.gov/genomes/all/GCF/000/006/925/GCF_000006925.2_ASM692v2
GCF_000223375.1	PRJNA161161	SAMN02603460		reference genome	759362	92945	Ketogulonicigenium vulgare WSH-001	strain=WSH-001		latest	Complete Genome	Major	Full	2011/08/12	ASM22337v1	Jiangnan University	GCA_000223375.1	identical	ftp://ftp.ncbi.nlm.nih.gov/genomes/all/GCF/000/223/375/GCF_000223375.1_ASM22337v1
GCF_000007465.2	PRJNA57947	SAMN02604090		reference genome	210007	1309	Streptococcus mutans UA159	strain=UA159		latest	Complete Genome	Major	Full	2011/09/01	ASM746v2	Univ. Oklahoma	GCA_000007465.2	identical	ftp://ftp.ncbi.nlm.nih.gov/genomes/all/GCF/000/007/465/GCF_000007465.2_ASM746v2
GCF_000008685.2	PRJNA57581	SAMN02603966		reference genome	224326	139	Borreliella burgdorferi B31	strain=B31		latest	Complete Genome	Major	Full	2011/11/09	ASM868v2	TIGR	GCA_000008685.2	identical	ftp://ftp.ncbi.nlm.nih.gov/genomes/all/GCF/000/008/685/GCF_000008685.2_ASM868v2		assembly from type material
GCF_000240185.1	PRJNA84387	SAMN02602959		reference genome	1125630	573	Klebsiella pneumoniae subsp. pneumoniae HS11286	strain=HS11286		latest	Complete Genome	Major	Full	2011/12/27	ASM24018v2	Bioinformatics & Microbial Genomics, State Key Laboratory of Microbial Metabolism, Shanghai Jiaotong University	GCA_000240185.2	identical	ftp://ftp.ncbi.nlm.nih.gov/genomes/all/GCF/000/240/185/GCF_000240185.1_ASM24018v2
GCF_000174395.2	PRJNA55353	SAMN00002237		reference genome	333849	1352	Enterococcus faecium DO	strain=DO		latest	Complete Genome	Major	Full	2012/05/25	ASM17439v2	Baylor College of Medicine	GCA_000174395.2	identical	ftp://ftp.ncbi.nlm.nih.gov/genomes/all/GCF/000/174/395/GCF_000174395.2_ASM17439v2
GCF_000007985.2	PRJNA57743	SAMN02603989		reference genome	243231	35554	Geobacter sulfurreducens PCA	strain=PCA		latest	Complete Genome	Major	Full	2012/07/31	ASM798v2	TIGR	GCA_000007985.2	identical	ftp://ftp.ncbi.nlm.nih.gov/genomes/all/GCF/000/007/985/GCF_000007985.2_ASM798v2		assembly from type material
GCF_000299455.1	PRJNA176127	SAMN01831188		reference genome	1133852	562	Escherichia coli O104:H4 str. 2011C-3493	strain=2011C-3493		latest	Complete Genome	Major	Full	2012/09/27	ASM29945v1	Los Alamos National Laboratory	GCA_000299455.1	identical	ftp://ftp.ncbi.nlm.nih.gov/genomes/all/GCF/000/299/455/GCF_000299455.1_ASM29945v1
GCF_000317935.1	PRJEA177516	SAMEA2272448		reference genome	1208660	519	Bordetella parapertussis Bpp5	strain=Bpp5		latest	Complete Genome	Major	Full	2012/10/08	ASM31793v1	WTSI	GCA_000317935.1	identical	ftp://ftp.ncbi.nlm.nih.gov/genomes/all/GCF/000/317/935/GCF_000317935.1_ASM31793v1
GCF_000318015.1	PRJNA178913	SAMEA2272388		reference genome	568707	518	Bordetella bronchiseptica 253	strain=253		latest	Complete Genome	Major	Full	2012/10/11	ASM31801v1	WTSI	GCA_000318015.1	identical	ftp://ftp.ncbi.nlm.nih.gov/genomes/all/GCF/000/318/015/GCF_000318015.1_ASM31801v1
GCF_000146165.2	PRJNA57949	SAMN02604014		reference genome	211586	70863	Shewanella oneidensis MR-1	strain=MR-1		latest	Complete Genome	Major	Full	2012/11/02	ASM14616v2	TIGR	GCA_000146165.2	identical	ftp://ftp.ncbi.nlm.nih.gov/genomes/all/GCF/000/146/165/GCF_000146165.2_ASM14616v2		assembly from type material
GCF_000195955.2	PRJNA57777	SAMEA3138326		reference genome	83332	1773	Mycobacterium tuberculosis H37Rv	strain=H37Rv		latest	Complete Genome	Major	Full	2013/02/01	ASM19595v2	Sanger Institute	GCA_000195955.2	identical	ftp://ftp.ncbi.nlm.nih.gov/genomes/all/GCF/000/195/955/GCF_000195955.2_ASM19595v2		assembly from type material
GCF_000064305.2	PRJNA61627	SAMEA3138269		reference genome	402612	96345	Flavobacterium psychrophilum JIP02/86	strain=JIP02/86		latest	Complete Genome	Major	Full	2013/05/30	ASM6430v2	I.N.R.A., FRANCE	GCA_000064305.2	identical	ftp://ftp.ncbi.nlm.nih.gov/genomes/all/GCF/000/064/305/GCF_000064305.2_ASM6430v2
GCF_000005845.2	PRJNA57779	SAMN02604091		reference genome	511145	562	Escherichia coli str. K-12 substr. MG1655	strain=K-12 substr. MG1655		latest	Complete Genome	Major	Full	2013/09/26	ASM584v2	Univ. Wisconsin	GCA_000005845.2	identical	ftp://ftp.ncbi.nlm.nih.gov/genomes/all/GCF/000/005/845/GCF_000005845.2_ASM584v2
GCF_000006785.2	PRJNA57845	SAMN02604089		reference genome	160490	1314	Streptococcus pyogenes M1 GAS	strain=SF370		latest	Complete Genome	Major	Full	2014/04/01	ASM678v2	Univ. Oklahoma	GCA_000006785.2	identical	ftp://ftp.ncbi.nlm.nih.gov/genomes/all/GCF/000/006/785/GCF_000006785.2_ASM678v2
GCF_000006945.2	PRJNA57799	SAMN02604315		reference genome	99287	28901	Salmonella enterica subsp. enterica serovar Typhimurium str. LT2			latest	Complete Genome	Major	Full	2016/01/13	ASM694v2	Washington University Genome Sequencing Center	GCA_000006945.2	identical	ftp://ftp.ncbi.nlm.nih.gov/genomes/all/GCF/000/006/945/GCF_000006945.2_ASM694v2		assembly from type material
GCF_000007565.2	PRJNA57843	SAMN02603999		reference genome	160488	303	Pseudomonas putida KT2440	strain=KT2440		latest	Complete Genome	Major	Full	2016/02/26	ASM756v2	TIGR	GCA_000007565.2	identical	ftp://ftp.ncbi.nlm.nih.gov/genomes/all/GCF/000/007/565/GCF_000007565.2_ASM756v2
GCF_000007765.2	PRJNA57631	SAMN02603970		reference genome	227377	777	Coxiella burnetii RSA 493	strain=RSA 493		latest	Complete Genome	Major	Full	2016/11/10	ASM776v2	TIGR	GCA_000007765.2	identical	ftp://ftp.ncbi.nlm.nih.gov/genomes/all/GCF/000/007/765/GCF_000007765.2_ASM776v2
GCF_000195835.2	PRJNA57695	SAMEA20450668		reference genome	233413	1773	Mycobacterium tuberculosis variant bovis AF2122/97		AF2122/97	latest	Complete Genome	Major	Full	2017/01/19	ASM19583v2	School of Veterinary Medicine	GCA_000195835.2	identical	ftp://ftp.ncbi.nlm.nih.gov/genomes/all/GCF/000/195/835/GCF_000195835.2_ASM19583v2
GCF_000009205.2	PRJNA57679	SAMEA1705932		reference genome	272563	1496	Clostridioides difficile 630	strain=630		latest	Complete Genome	Major	Full	2017/09/29	ASM920v2	Sanger Institute	GCA_000009205.2	identical	ftp://ftp.ncbi.nlm.nih.gov/genomes/all/GCF/000/009/205/GCF_000009205.2_ASM920v2
GCF_000008865.2	PRJNA57781	SAMN01911278		reference genome	386585	562	Escherichia coli O157:H7 str. Sakai	strain=Sakai substr. RIMD 0509952		latest	Complete Genome	Major	Full	2018/06/08	ASM886v2	GIRC	GCA_000008865.2	identical	ftp://ftp.ncbi.nlm.nih.gov/genomes/all/GCF/000/008/865/GCF_000008865.2_ASM886v2
